# Supplementary material for: Prospective Whole-Genome Sequencing Enhances National Surveillance of Listeria monocytogenes
Source: PubMed Central journal article supplement (PMC4733179; doi:10.1128/jcm.02344-15), 2016-01-28
Supplement: JCM.02344-15_zjm999094739so1.pdf [file JCM.02344-15_zjm999094739so1.pdf]

## SUPPLEMENTAL MATERIAL

**Title:** Prospective whole genome sequencing enhances national surveillance of *Listeria monocytogenes*

**Authors:** Jason C Kwong,<sup>a,b,c</sup> Karolina Mercoulia,<sup>b</sup> Takehiro Tomita,<sup>b</sup> Marion Easton,<sup>b</sup> Hua Y Li,<sup>b</sup> Dieter M Bulach,<sup>a,d</sup> Timothy P Stinear,<sup>a,e</sup> Torsten Seemann,<sup>a,d</sup> Benjamin P Howden<sup>a,b,c,e</sup> #

**Affiliations:** Doherty Centre for Applied Microbial Genomics<sup>a</sup> and Microbiological Diagnostic Unit Public Health Laboratory, University of Melbourne at the Doherty Institute for Infection & Immunity, Melbourne, Victoria, Australia,<sup>b</sup> Infectious Diseases Department, Austin Health, Heidelberg, Victoria, Australia,<sup>c</sup> Victorian Life Sciences Computation Initiative, University of Melbourne, Victoria, Australia,<sup>d</sup> Department of Microbiology, Monash University, Clayton, Victoria, Australia<sup>e</sup>

**Keywords:** *Listeria monocytogenes*, public health microbiology, whole genome sequencing, typing, pathogen surveillance

**Running title:** Prospective genomic surveillance of *L. monocytogenes*

**TABLE S1: Raw sequencing metrics**

|                                                        | Stored isolates                                   | Prospective isolates          |
|--------------------------------------------------------|---------------------------------------------------|-------------------------------|
| <b>Read lengths (n)</b>                                | 151 bp (n=80)<br>251 bp (n=212)<br>301 bp (n=131) | 151 bp (n=7)<br>301 bp (n=90) |
| <b>Average per base read quality score<sup>a</sup></b> | 34.9 (31.1 – 37.2)                                | 34.6 (33.2 – 36)              |
| <b>Average read depth / coverage</b>                   | 69.8 (30 – 206)                                   | 115.6 (71 – 314)              |

<sup>a</sup> Per base read quality scores:  
10 = 1 error per 10 bases (90% accuracy);  
20 = 1 error per 100 bases (99% accuracy);  
30 = 1 error per 1000 bases (99.9% accuracy)

A minimum read depth of 30 and quality score >30 was considered acceptable.

**TABLE S2: Primer sequences for Serogrouping**

| <b>Gene name</b>     | <b>Primer Name</b>              | <b>Primer sequence (5'-3')</b>  | <b>PCR product size</b>         |                                 |                             |
|----------------------|---------------------------------|---------------------------------|---------------------------------|---------------------------------|-----------------------------|
| <i>lmo0737</i>       | LC3F                            | AGGGCTTCAAGGACTTACCC            | 691 bp                          |                                 |                             |
|                      | LC3R                            | ACGATTTCTGCTTGCCATTC            |                                 |                                 |                             |
| <i>lmo1118</i>       | LC52F                           | AGGGGTCTTAAATCCTGGAA            | 906 bp                          |                                 |                             |
|                      | LC52R                           | CGGCTTGTTTCGGCATACTTA           |                                 |                                 |                             |
| <b>ORF2110</b>       | LB10F                           | AGTGGACAATTGATTGGTGAA           | 597 bp                          |                                 |                             |
|                      | LB10R                           | CATCCATCCCTTACTTTGGAC           |                                 |                                 |                             |
| <b>ORF2819</b>       | LB50F                           | AGCAAAATGCCAAAACTCGT            | 471 bp                          |                                 |                             |
|                      | LB50R                           | CATCACTAAAGCCTCCCATTG           |                                 |                                 |                             |
| <i>prs</i>           | LC32F                           | GCTGAAGAGATTGCGAAAGAAG          | 370 bp                          |                                 |                             |
|                      | LC32R                           | CAAAGAAACCTTGGATTTGCGG          |                                 |                                 |                             |
| <b>Serogroup</b>     | <i>lmo1118</i><br><b>691 bp</b> | <i>lmo0737</i><br><b>906 bp</b> | <b>ORF2110</b><br><b>597 bp</b> | <b>ORF2819</b><br><b>471 bp</b> | <i>prs</i><br><b>370 bp</b> |
| <b>1/2a, 3a</b>      | –                               | +                               | –                               | –                               | +                           |
| <b>1/2b, 3b, 7</b>   | –                               | –                               | –                               | +                               | +                           |
| <b>1/2c, 3c</b>      | +                               | +                               | –                               | –                               | +                           |
| <b>4b, 4d, 4e</b>    | –                               | –                               | +                               | +                               | +                           |
| <b>Listeria spp.</b> |                                 |                                 |                                 |                                 | +                           |

From Doumith et al, J Clin Microbiol 2004 (1)

**TABLE S3: List of reference genomes used for comparison**

| ID              | Assembly        | BioProject  | BioSample    | Lineage | Serotype | MLST (CC) | Year isolated | Source      | Metadata (Reference)                                                                                         |
|-----------------|-----------------|-------------|--------------|---------|----------|-----------|---------------|-------------|--------------------------------------------------------------------------------------------------------------|
| 07PF0776        | GCA_000258905.1 | PRJNA78811  | SAMN02604190 | I       | 4b       |           |               | Human       | Myocardial abscess; human clinical, USA (2)                                                                  |
| 08_5578         | GCA_000093125.2 | PRJNA36361  | SAMN02603776 | II      | 1/2a     |           | 2008          | Human       | Canadian outbreak 2008; human blood, Canada (3)                                                              |
| 08_5923         | GCA_000022925.1 | PRJNA36363  | SAMN02603721 | II      | 1/2a     | 120 (8)   | 2008          | Human       | Canadian outbreak 2008; human blood, Canada (3)                                                              |
| 10403S          | GCA_000168695.2 | PRJNA17495  | SAMN02641382 | II      | 1/2a     | 85        | 1968          | Human       | Broad Institute, streptomycin resistant isolate of parental strain from 1968; human skin lesions, USA (4, 5) |
| 6179            | GCA_000577745.1 | PRJEB1355   | SAMEA3138937 | II      | 1/2a     | 121       |               | Environment | Cheese production environment; persistent strain (6, 7)                                                      |
| ATCC_19117      | GCA_000307025.1 | PRJEA51859  | SAMEA2271997 | I       | 4d       | 2         |               | Animal      | Sheep isolate, USA (8-10)                                                                                    |
| C1-387          | GCA_000438605.1 | PRJNA203445 | SAMN02203127 | II      | 1/2a     |           | 1999          | Food        | Isolated from turkey breast, New York, USA (11, 12)                                                          |
| CFSAN006122     | GCA_000681515.1 | PRJNA215355 | SAMN02318985 | I       |          |           | 2013          | Food        | FDA GenomeTrakr; cheese, USA (13)                                                                            |
| CFSAN007956     | GCA_001005985.1 | PRJNA215355 | SAMN02569973 | II      |          |           |               |             | FDA GenomeTrakr, USA (13)                                                                                    |
| CFSAN008100     | GCA_001005925.1 | PRJNA215355 | SAMN02689388 | I       |          |           |               | Food        | FDA GenomeTrakr; green chile ingredient, USA (13)                                                            |
| Clip80459       | GCA_000026705.1 | PRJEA32207  | SAMEA2272134 | I       | 4b       | 4         | 1999          | Human       | Rillettes epidemic; human clinical, France (14)                                                              |
| EGDe            | GCA_000196035.1 | PRJNA276    | SAMEA3138329 | II      | 1/2a     | 35        | 1924          | Animal      | Lab strain from rabbit isolate (15)                                                                          |
| F2365           | GCA_000008285.1 | PRJNA85     | SAMN02603980 | I       | 4b       | 1         | 1985          | Food        | Jalisco cheese outbreak in California, USA (16)                                                              |
| FSL_J1-208      | GCA_000250715.1 | PRJNA53559  | SAMN01121066 | IV      | 4a       |           |               | Animal      | Outbreak in goat herds (17, 18)                                                                              |
| FSL_R2_561      | GCA_000168575.2 | PRJNA17317  | SAMN00013319 | II      | 1/2c     |           |               |             | (19)                                                                                                         |
| Finland_1998    | GCA_000168595.2 | PRJNA17319  | SAMN00012880 | II      | 3a       |           | 1998          | Human       | Butter outbreak; food/clinical, Finland (20)                                                                 |
| HCC23           | GCA_000021185.1 | PRJNA29409  | SAMN02603154 | III     | 4a       |           |               | Animal      | Avirulent strain from spleen of healthy channel catfish, USA (21, 22)                                        |
| IZSAM_Lm_hs2008 | GCA_000808055.1 | PRJNA261392 | SAMN03073546 | I       | 4b       |           | 2009          | Human       | Cerebrospinal fluid (CSF), Italy (23)                                                                        |
| J0161           | GCA_000168635.2 | PRJNA17493  | SAMN00769971 | II      | 1/2a     |           | 2000          | Human       | Human outbreak delicatessen turkey meat, USA (24)                                                            |
| J1776           | GCA_000438705.2 | PRJNA203445 | SAMN02203125 | I       | 4b       |           | 2002          | Food        | Turkey deli, USA (11)                                                                                        |
| J1816           | GCA_000195395.3 | PRJNA60535  | SAMN01816124 | I       | 4b       |           | 2002          | Environment | Turkey deli, USA (11, 25)                                                                                    |
| J1817           | GCA_000438725.2 | PRJNA203445 | SAMN02203129 | I       | 4b       |           | 2002          | Environment | Turkey deli, USA (11)                                                                                        |
| J1926           | GCA_000438745.2 | PRJNA203445 | SAMN02203130 | I       | 4b       |           | 2002          | Human       | Turkey deli, USA (11)                                                                                        |
| J1_220          | GCA_000195435.3 | PRJNA60537  | SAMN01813900 | I       | 4b       |           | 1979          | Human       | Outbreak with vegetables; human, Boston, USA (11, 25)                                                        |
| J2-031          | GCA_000438645.1 | PRJNA203445 | SAMN02203124 | II      | 1/2a     |           | 1996          | Animal      | Isolated from cow, USA (11)                                                                                  |
| J2-064          | GCA_000438625.1 | PRJNA203445 | SAMN02203122 | I       | 1/2b     | 5         | 1989          | Animal      | Isolated from cow, USA (11)                                                                                  |
| J2-1091         | GCA_000438665.1 | PRJNA203445 | SAMN02203123 | II      | 1/2a     |           | 1995          | Animal      | USA (12)                                                                                                     |

|           |                 |             |              |     |      |         |           |             |                                                                                     |
|-----------|-----------------|-------------|--------------|-----|------|---------|-----------|-------------|-------------------------------------------------------------------------------------|
| L1846     | GCA_001027085.1 | PRJNA243081 | SAMN02712416 | II  | 1/2b |         | 2009      | Human       | Human clinical isolate; CDC, USA (26)                                               |
| L2074     | GCA_001027065.1 | PRJNA243260 | SAMN02713647 | II  | 1/2a |         | 2010      | Human       | Human clinical isolate; CDC, USA (26)                                               |
| L2624     | GCA_001027165.1 | PRJNA243265 | SAMN02713668 | I   | 1/2b |         | 2011      | Human       | Cantaloupe, human outbreak, USA (27)                                                |
| L2625     | GCA_001027125.1 | PRJNA243264 | SAMN02713648 | II  | 1/2a |         | 2011      | Human       | Cantaloupe, human outbreak, USA (27)                                                |
| L2626     | GCA_001027245.1 | PRJNA243256 | SAMN02713641 | II  | 1/2a |         | 2011      | Human       | Cantaloupe, human outbreak, USA (27)                                                |
| L2676     | GCA_001027205.1 | PRJNA243258 | SAMN02713644 | II  | 1/2a |         | 2011      | Human       | Cantaloupe, human outbreak, USA (27)                                                |
| L312      | GCA_000307085.1 | PRJEA51857  | SAMEA2272305 | I   | 4b   | 4       |           | Food        | Cheese (9)                                                                          |
| L99       | GCA_000209755.1 | PRJEA31327  | SAMEA2272406 | III | 4a   | 201     | 1950      | Food        | Cheese, Netherlands (8, 9)                                                          |
| LL195     | GCA_000318055.1 | PRJEB418    | SAMEA2272544 | I   | 4b   |         | 1983-1987 | Human       | 1983-1987 Switzerland outbreak; human clinical isolate, Switzerland (28)            |
| La111     | GCA_000382925.1 | PRJEB538    | SAMEA2272573 | II  | 1/2a |         | 1996      | Food        | Smoked salmon from fish processing plant, Denmark (29)                              |
| Lm60      | GCA_000746625.1 | PRJNA255073 | SAMN03003922 | II  | 1/2a | 551     | 2006      | Human       | Isolated from blood, Switzerland (30)                                               |
| M7        | GCA_000218305.1 | PRJNA66625  | SAMN02604342 | III | 4a   |         |           | Food        | Non-pathogenic isolate from cow's milk, China (31)                                  |
| N1-011A   | GCA_000438685.2 | PRJNA203445 | SAMN02203128 | I   | 1/2b |         |           | Environment | Environmental isolate, USA (32)                                                     |
| N2306     | GCA_000950775.1 | PRJNA276441 | SAMN03372633 | I   | 4b   |         | 2013-2014 | Human       | 2013-2014 outbreak in ready-to-eat salads; human clinical isolate, Switzerland (33) |
| N53_1     | GCA_000382945.1 | PRJEB539    | SAMEA2271966 | II  | 1/2a |         | 2002      | Environment | Fish processing plant environment, Denmark (29)                                     |
| NE_dc2014 | GCA_000600015.1 | PRJNA241322 | SAMN02689320 | I   |      |         | 2014      | Food        | USA (34)                                                                            |
| NTSN      | GCA_000800335.1 | PRJNA267024 | SAMN03177401 | I   | 4b   |         | 2011      | Animal      | Sheep brain, China (35)                                                             |
| QOC1 *    | GCA_000689335.1 | PRJEB1353   | SAMEA3139005 | II  | 1/2a | 403     | 2010      | Human       | Quargel outbreak clone 1, blood culture isolate, Austria (36)                       |
| QOC2 *    | GCA_000613165.1 | PRJEB1354   | SAMEA3138995 | II  | 1/2a | 398     | 2010      | Human       | Quargel outbreak clone 2, blood culture isolate, Austria (36)                       |
| R2-502    | GCA_000438585.1 | PRJNA203445 | SAMN02203126 | I   | 1/2b |         | 1994      | Food        | Illinois chocolate milk; food (11)                                                  |
| R479a     | GCA_000613085.1 | PRJEB5108   | SAMEA3138991 | II  | 1/2a | 8       | 1996-1999 | Food        | Smoked salmon, Denmark (37)                                                         |
| SLCC2372  | GCA_000210815.2 | PRJEA50377  | SAMEA2272627 | II  | 1/2c | 122 (9) | 1935      | Human       | Human, UK (8, 9)                                                                    |
| SLCC2376  | GCA_000307065.1 | PRJEA51863  | SAMEA2272177 | III | 4c   | 71      |           | Animal      | Poultry (8, 9)                                                                      |
| SLCC2378  | GCA_000307615.1 | PRJEA51729  | SAMEA2272689 | I   | 4e   | 73 (1)  |           | Animal      | Poultry (8, 9)                                                                      |
| SLCC2479  | GCA_000307005.1 | PRJEA51829  | SAMEA2272506 | II  | 3c   | 9       | 1966      |             | (8, 9)                                                                              |
| SLCC2482  | GCA_000210795.2 | PRJEA50371  | SAMEA2272162 | I   | 7    | 3       | 1966      | Human       | Human (8, 9)                                                                        |
| SLCC2540  | GCA_000306905.1 | PRJEA51731  | SAMEA2272785 | I   | 3b   |         | 1956      | Human       | Human, USA (8, 9)                                                                   |
| SLCC2755  | GCA_000197755.2 | PRJEA50379  | SAMEA2271969 | I   | 1/2b | 66 (3)  | 1967      | Animal      | Chinchilla (8, 9)                                                                   |

|          |                 |             |              |    |      |        |      |        |                                                                                   |
|----------|-----------------|-------------|--------------|----|------|--------|------|--------|-----------------------------------------------------------------------------------|
| SLCC5850 | GCA_000307045.1 | PRJEA51861  | SAMEA2272672 | II | 1/2a | 12 (7) | 1924 | Animal | Rabbit, UK (8, 9)                                                                 |
| SLCC7179 | GCA_000306985.1 | PRJEA51733  | SAMEA2272571 | II | 3a   | 91     | 1986 | Food   | Cheese, Austria (8, 9)                                                            |
| WSLC1001 | GCA_000568475.1 | PRJNA236721 | SAMN02743815 | II | 1/2a |        |      | Human  | ATCC19112? (reportedly serotype 1/2c); human clinical isolate (CSF), Germany (38) |
| WSLC1042 | GCA_000568935.1 | PRJNA236791 | SAMN02743817 | I  | 4b   |        |      |        | ATCC23074, Germany (38)                                                           |

\* Draft assembly – not used as a reference for analyses, but included for comparison

CC = Clonal Complex

Reference genomes retrieved from NCBI GenBank 22 June 2015.

**Table S4: Guide criteria for assigning genomic relatedness (see additional notes below)**

| Relatedness                  | Criteria                                                                                                                                                                                                                                                                                                                                                                                                                               |
|------------------------------|----------------------------------------------------------------------------------------------------------------------------------------------------------------------------------------------------------------------------------------------------------------------------------------------------------------------------------------------------------------------------------------------------------------------------------------|
| <b>Likely to be linked</b>   | <p>1. pairwise SNP distance &lt; 5 using a reference genome from the same MLST</p> <p>OR (where there have been previous isolates epidemiologically linked to the index)</p> <p>2. pairwise SNP distance less than the greatest pairwise SNP distance of a previous isolate epidemiologically linked to the index</p> <p>AND</p> <p>pairwise SNP distance less than that of each isolate not epidemiologically linked to the index</p> |
| <b>Possibly linked</b>       | <p>1. pairwise SNP distance <math>\geq 5</math> to &lt; 20 using a reference genome from the same MLST</p> <p>OR (where there are previous isolates of the same MLST not epidemiologically linked to the index)</p> <p>2. pairwise SNP distance <math>\geq 20</math></p> <p>AND</p> <p>more closely related to the index isolate than to previous “not epidemiologically linked” isolates</p>                                          |
| <b>Unlikely to be linked</b> | <p>1. isolate from a different clonal complex to the index isolate</p> <p>OR (where there have been previous isolates linked to the index)</p> <p>2. pairwise SNP distance greater than that of another isolate previously known to be “not epidemiologically linked”</p> <p>AND</p> <p>pairwise SNP distance greater than that of each isolate linked to the index</p>                                                                |

**Additional notes for Table S4:**

- Isolates that cannot be assigned should be discussed, with the default assignment as “possibly linked” unless agreed otherwise
- The pairwise SNP distance threshold of < 5 for “likely to be linked” was selected, as the median SNP distance between isolates from previously defined outbreaks was 4, using the reported methods and parameters.
- The pairwise SNP distance threshold of 20 for “possibly linked” was selected, as this was the maximum SNP distance between isolates from previously defined outbreaks. This value is also consistent with previous reports (39).
- The criteria are intended as a guide for further epidemiologic analysis, and are not intended to be rigid. Exceptions can be made with sufficient evidence and agreement from epidemiologists, bioinformaticians and microbiologists.

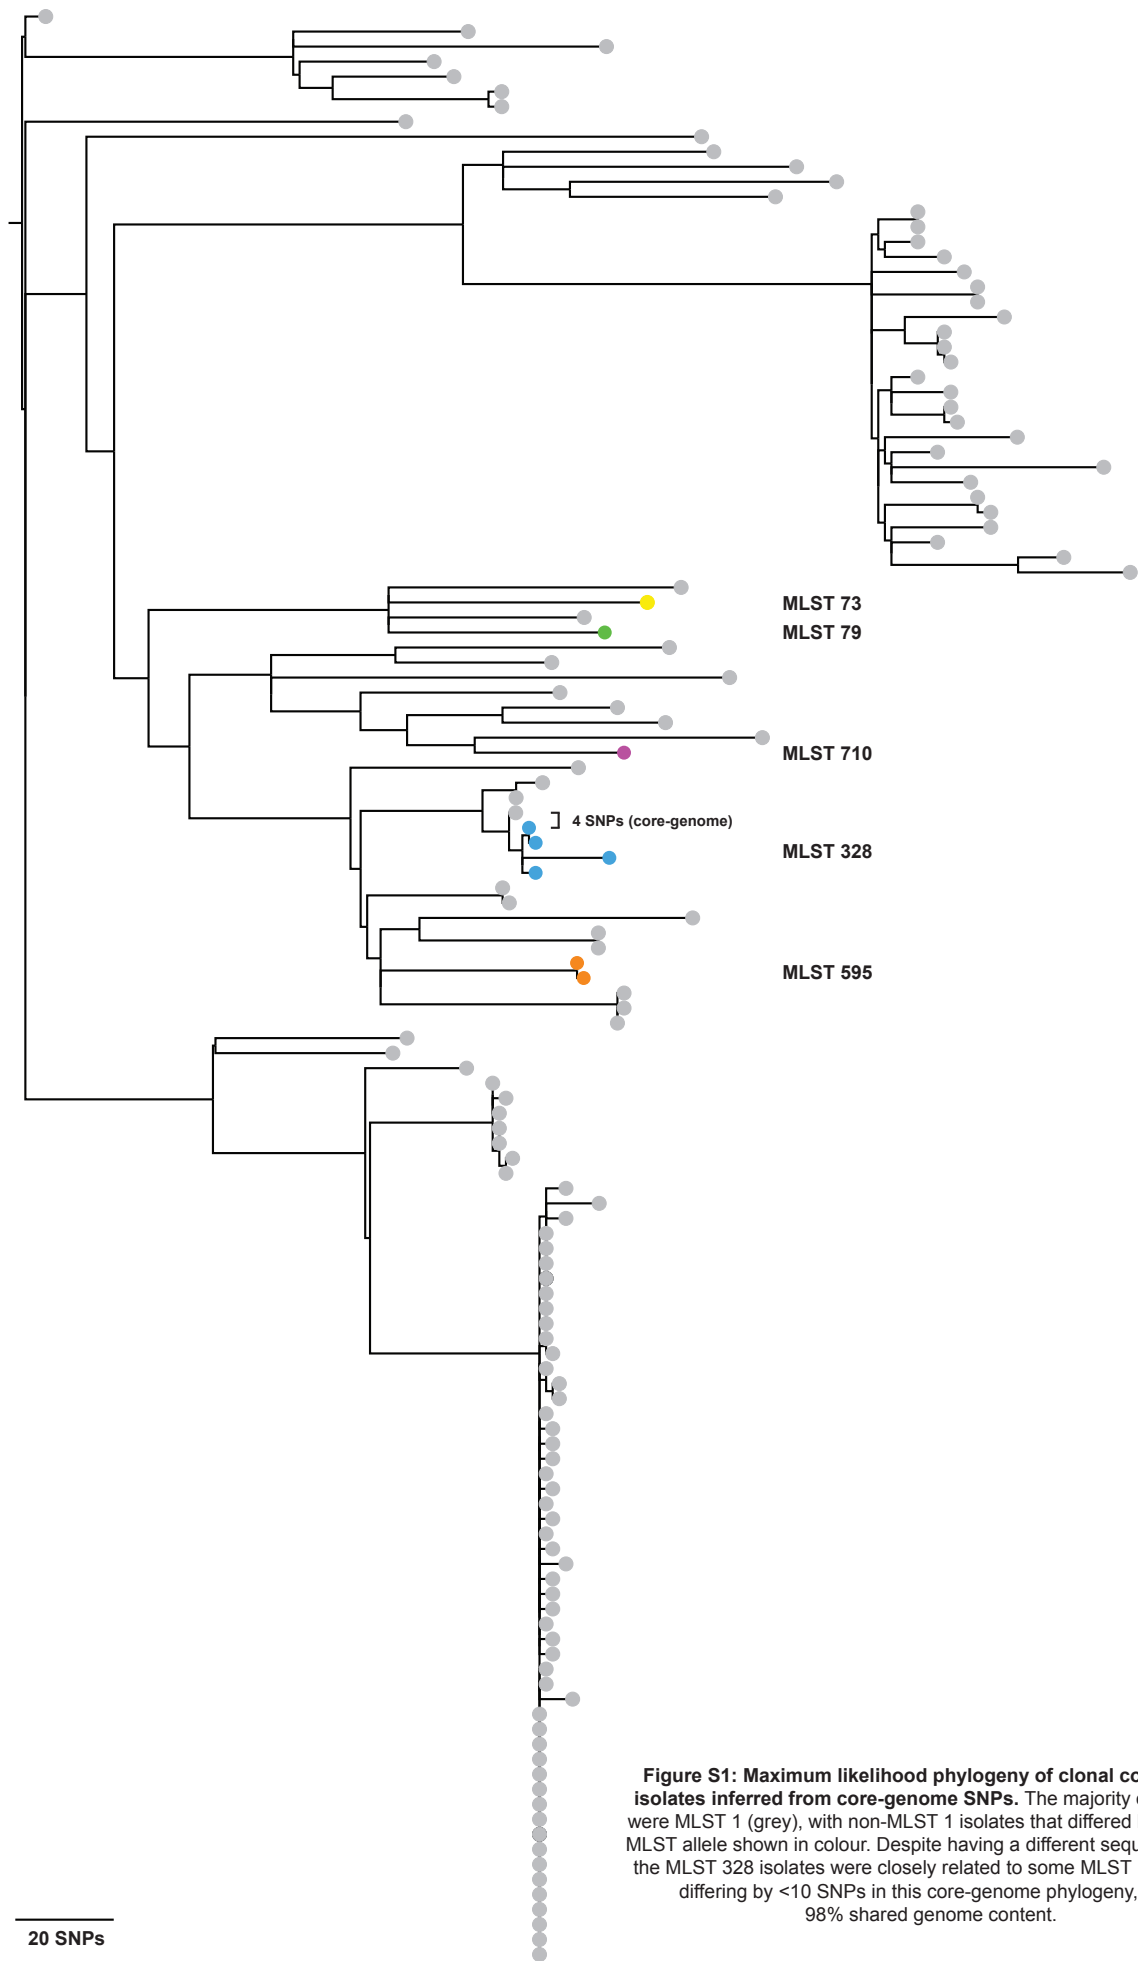

**Figure S1: Maximum likelihood phylogeny of clonal complex 1 isolates inferred from core-genome SNPs.** The majority of isolates were MLST 1 (grey), with non-MLST 1 isolates that differed by a single MLST allele shown in colour. Despite having a different sequence type, the MLST 328 isolates were closely related to some MLST 1 isolates, differing by <10 SNPs in this core-genome phylogeny, with 98% shared genome content.

## REFERENCES

1. **Doumith M, Buchrieser C, Glaser P, Jacquet C, Martin P.** 2004. Differentiation of the major *Listeria monocytogenes* serovars by multiplex PCR. *J Clin Microbiol* **42**:3819-3822.
2. **McMullen PD, Gillaspay AF, Gipson J, Bobo LD, Skiest DJ, Freitag NE.** 2012. Genome sequence of *Listeria monocytogenes* 07PF0776, a cardiotropic serovar 4b strain. *J Bacteriol* **194**:3552.
3. **Gilmour MW, Graham M, Van Domselaar G, Tyler S, Kent H, Trout-Yakel KM, Larios O, Allen V, Lee B, Nadon C.** 2010. High-throughput genome sequencing of two *Listeria monocytogenes* clinical isolates during a large foodborne outbreak. *BMC Genomics* **11**:120.
4. **Bishop DK, Hinrichs DJ.** 1987. Adoptive transfer of immunity to *Listeria monocytogenes*. The influence of in vitro stimulation on lymphocyte subset requirements. *J Immunol* **139**:2005-2009.
5. **Edman DC, Pollock MB, Hall ER.** 1968. *Listeria monocytogenes* L forms. I. Induction maintenance, and biological characteristics. *J Bacteriol* **96**:352-357.
6. **Fox EM, Leonard N, Jordan K.** 2011. Physiological and transcriptional characterization of persistent and nonpersistent *Listeria monocytogenes* isolates. *Appl Environ Microbiol* **77**:6559-6569.
7. **Schmitz-Esser S RK, Mueller A, and Wagner M.** Institute for Milk Hygiene, University of Veterinary Medicine, Vienna, Austria. unpublished.
8. **Haase JK, Murphy RA, Choudhury KR, Achtman M.** 2011. Revival of Seeliger's historical 'Special *Listeria* Culture Collection'. *Environ Microbiol* **13**:3163-3171.
9. **Kuenne C, Billion A, Mraheil MA, Strittmatter A, Daniel R, Goesmann A, Barbuddhe S, Hain T, Chakraborty T.** 2013. Reassessment of the *Listeria monocytogenes* pan-genome reveals dynamic integration hotspots and mobile genetic elements as major components of the accessory genome. *BMC Genomics* **14**:47.
10. **Seeliger H.** 1961. *Listeriosis*. Hafner, New York,.
11. **Lomonaco S, Knabel SJ, Dalmaso A, Civera T, Bottero MT.** 2011. Novel multiplex single nucleotide polymorphism-based method for identifying epidemic clones of *Listeria monocytogenes*. *Appl Environ Microbiol* **77**:6290-6294.
12. **Roberson D CY, Xie Y, Thao K, Dao N, Clark TA, Boitano M, Korlach J, and Weimer B.** School of Veterinary Medicine, University of California at Davis, USA. unpublished.
13. **Timme R AM, Strain E, Evans PS, and Brown E.** Center for Food Safety and Applied Nutrition, US FDA, USA. unpublished.
14. **Hain T, Ghai R, Billion A, Kuenne CT, Steinweg C, Izar B, Mohamed W, Mraheil MA, Domann E, Schaffrath S, Karst U, Goesmann A, Oehm S, Puhler A, Merkl R, Vorwerk S, Glaser P, Garrido P, Rusniok C, Buchrieser C, Goebel W, Chakraborty T.** 2012. Comparative genomics and transcriptomics of lineages I, II, and III strains of *Listeria monocytogenes*. *BMC Genomics* **13**:144.
15. **Glaser P, Frangeul L, Buchrieser C, Rusniok C, Amend A, Baquero F, Berche P, Bloecker H, Brandt P, Chakraborty T, Charbit A, Chetouani F, Couve E, de Daruvar A, Dehoux P, Domann E, Dominguez-Bernal G, Duchaud E, Durant L, Dussurget O, Entian KD, Fsihi H, Garcia-del Portillo F, Garrido P, Gautier L, Goebel W, Gomez-Lopez N, Hain T, Hauf J, Jackson D, Jones LM, Kaerst U, Kreft J, Kuhn M, Kunst F, Kurapkat G, Madueno E, Maitournam A, Vicente JM, Ng E, Nedjari H, Nordsiek G, Novella S, de Pablos B, Perez-**



- Diaz JC, Purcell R, Rimmel B, Rose M, Schlueter T, Simoes N, et al.** 2001. Comparative genomics of *Listeria* species. *Science* **294**:849-852.
16. **Nelson KE, Fouts DE, Mongodin EF, Ravel J, DeBoy RT, Kolonay JF, Rasko DA, Angiuoli SV, Gill SR, Paulsen IT, Peterson J, White O, Nelson WC, Nierman W, Beanan MJ, Brinkac LM, Daugherty SC, Dodson RJ, Durkin AS, Madupu R, Haft DH, Selengut J, Van Aken S, Khouri H, Fedorova N, Forberger H, Tran B, Kathariou S, Wonderling LD, Uhlich GA, Bayles DO, Luchansky JB, Fraser CM.** 2004. Whole genome comparisons of serotype 4b and 1/2a strains of the food-borne pathogen *Listeria monocytogenes* reveal new insights into the core genome components of this species. *Nucleic Acids Res* **32**:2386-2395.
  17. **den Bakker HC, Bowen BM, Rodriguez-Rivera LD, Wiedmann M.** 2012. FSL J1-208, a virulent uncommon phylogenetic lineage IV *Listeria monocytogenes* strain with a small chromosome size and a putative virulence plasmid carrying internalin-like genes. *Appl Environ Microbiol* **78**:1876-1889.
  18. **Wiedmann M, Mobini S, Cole JR, Jr., Watson CK, Jeffers GT, Boor KJ.** 1999. Molecular investigation of a listeriosis outbreak in goats caused by an unusual strain of *Listeria monocytogenes*. *J Am Vet Med Assoc* **215**:369-371, 340.
  19. **Borowsky M YS, Zeng Q, Koehrsen M, Fitzgerald M, Alvarado L, Berlin A, Bochicchio J, Borenstein D, Chapman S, Chen Z, Engels R, Freedman E, Gellesch M, Goldberg J, Griggs A, Gujja S, Heilman E, Heiman D, Hepburn T, Towarth C, Jen D, Larson L, Lewis B, Mehta T, Park D, Pearson M, Roberts A, Saif S, Shead T, Shenoy N, Sisk P, Stolte C, Sykes S, Thomson T, Walk T, White J, Yandava C, Borodovsky M, Wiedmann M, Swaminathan B, Lauer P, Portnoy D, Cossart P, Buchrieser C, Higgins D, Haas B, Nusbaum C, and Birren B.** Broad Institute of MIT and Harvard, USA. unpublished.
  20. **Lyytikainen O, Autio T, Maijala R, Ruutu P, Honkanen-Buzalski T, Miettinen M, Hatakka M, Mikkola J, Anttila VJ, Johansson T, Rantala L, Aalto T, Korkeala H, Siitonen A.** 2000. An outbreak of *Listeria monocytogenes* serotype 3a infections from butter in Finland. *J Infect Dis* **181**:1838-1841.
  21. **Erdenlig S, Ainsworth AJ, Austin FW.** 2000. Pathogenicity and production of virulence factors by *Listeria monocytogenes* isolates from channel catfish. *J Food Prot* **63**:613-619.
  22. **Steele CL, Donaldson JR, Paul D, Banes MM, Arick T, Bridges SM, Lawrence ML.** 2011. Genome sequence of lineage III *Listeria monocytogenes* strain HCC23. *J Bacteriol* **193**:3679-3680.
  23. **Centorame P, Acciari VA, Orsini M, Torresi M, Iannetti L, Angius A, Di Giammartino D, Prencipe VA, Migliorati G.** 2015. Whole-Genome Sequence of *Listeria monocytogenes* Serovar 4b Strain IZSAM\_Lm\_hs2008, Isolated from a Human Infection in Italy. *Genome Announc* **3**.
  24. **Olsen SJ, Patrick M, Hunter SB, Reddy V, Kornstein L, MacKenzie WR, Lane K, Bidol S, Stoltman GA, Frye DM, Lee I, Hurd S, Jones TF, LaPorte TN, Dewitt W, Graves L, Wiedmann M, Schoonmaker-Bopp DJ, Huang AJ, Vincent C, Bugenhagen A, Corby J, Carloni ER, Holcomb ME, Woron RF, Zansky SM, Dowdle G, Smith F, Ahrabi-Fard S, Ong AR, Tucker N, Hynes NA, Mead P.** 2005. Multistate outbreak of *Listeria monocytogenes* infection linked to delicatessen turkey meat. *Clin Infect Dis* **40**:962-967.
  25. **Chen Y, Strain EA, Allard M, Brown EW.** 2011. Genome sequences of *Listeria monocytogenes* strains J1816 and J1-220, associated with human outbreaks. *J Bacteriol* **193**:3424-3425.

26. **Bergholz TM dBH, Turnsek M, Katz L, Joseph LA, Gladney LM, Kucerova Z, Silk B, Ward TJ, Frace M, Wiedmann M, and Tarr CL.** Centers for Disease Control and Prevention, USA. unpublished.
27. **Lomonaco S, Verghese B, Gerner-Smidt P, Tarr C, Gladney L, Joseph L, Katz L, Turnsek M, Frace M, Chen Y, Brown E, Meinersmann R, Berrang M, Knabel S.** 2013. Novel epidemic clones of *Listeria monocytogenes*, United States, 2011. *Emerg Infect Dis* **19**:147-150.
28. **Weinmaier T, Riesing M, Rattei T, Bille J, Arguedas-Villa C, Stephan R, Tasara T.** 2013. Complete Genome Sequence of *Listeria monocytogenes* LL195, a Serotype 4b Strain from the 1983-1987 Listeriosis Epidemic in Switzerland. *Genome Announc* **1**.
29. **Holch A, Webb K, Lukjancenko O, Ussery D, Rosenthal BM, Gram L.** 2013. Genome sequencing identifies two nearly unchanged strains of persistent *Listeria monocytogenes* isolated at two different fish processing plants sampled 6 years apart. *Appl Environ Microbiol* **79**:2944-2951.
30. **Tasara T, Weinmaier T, Klumpp J, Rattei T, Stephan R.** 2014. Complete Genome Sequence of *Listeria monocytogenes* Lm60, a Strain with an Enhanced Cold Adaptation Capacity. *Genome Announc* **2**.
31. **Chen J, Xia Y, Cheng C, Fang C, Shan Y, Jin G, Fang W.** 2011. Genome sequence of the nonpathogenic *Listeria monocytogenes* serovar 4a strain M7. *J Bacteriol* **193**:5019-5020.
32. **Chen Y, Zhang W, Knabel SJ.** 2007. Multi-virulence-locus sequence typing identifies single nucleotide polymorphisms which differentiate epidemic clones and outbreak strains of *Listeria monocytogenes*. *J Clin Microbiol* **45**:835-846.
33. **Tasara T, Ebner R, Klumpp J, Stephan R.** 2015. Complete Genome Sequence of *Listeria monocytogenes* N2306, a Strain Associated with the 2013-2014 Listeriosis Outbreak in Switzerland. *Genome Announc* **3**.
34. **Epie NN BM, Kan H-Y, Akanegbu C, and Diallo A.** Department of Forensic Sciences, DC Public Health Laboratory, USA. unpublished.
35. **Tan W, Wang G, Pan Z, Yin Y, Jiao X.** 2015. Complete Genome Sequence of *Listeria monocytogenes* NTSN, a Serovar 4b and Animal Source Strain. *Genome Announc* **3**.
36. **Rychli K, Muller A, Zaiser A, Schoder D, Allerberger F, Wagner M, Schmitz-Esser S.** 2014. Genome sequencing of *Listeria monocytogenes* "Quargel" listeriosis outbreak strains reveals two different strains with distinct in vitro virulence potential. *PLoS One* **9**:e89964.
37. **Schmitz-Esser S, Gram L, Wagner M.** 2015. Complete Genome Sequence of the Persistent *Listeria monocytogenes* Strain R479a. *Genome Announc* **3**.
38. **Klumpp J, Staubli T, Schmitter S, Hupfeld M, Fouts DE, Loessner MJ.** 2014. Genome Sequences of Three Frequently Used *Listeria monocytogenes* and *Listeria ivanovii* Strains. *Genome Announc* **2**.
39. **Wang Q, Holmes N, Martinez E, Howard P, Hill-Cawthorne G, Sintchenko V.** 2015. It Is Not All about Single Nucleotide Polymorphisms: Comparison of Mobile Genetic Elements and Deletions in *Listeria monocytogenes* Genomes Links Cases of Hospital-Acquired Listeriosis to the Environmental Source. *J Clin Microbiol* **53**:3492-3500.
